# Supplementary material for: Development of a Multi-Layer Skin Substitute Using Human Hair Keratinic Extract-Based Hybrid 3D Printing
Source: MDPI journal article supplement (doi:10.3390/polym13162584), 2021-08-04
Supplement: s1 [file s1]

# **Development of a multi-layer skin substitute using human hair keratin-based hybrid 3D printing**

## **< Supplementary Materials >**

**Won Seok Choi <sup>1,†</sup>, Joo Hyun Kim <sup>1,†</sup>, Chi Bum Ahn <sup>2</sup>, Ji Hyun Lee <sup>2</sup>, Yu Jin Kim <sup>3</sup>, Kuk Hui Son <sup>4,\*</sup> and Jin Woo Lee <sup>1,2,\*</sup>**

<sup>1</sup>Department of Health Sciences and Technology, GAIHST, Gachon University, Incheon, Republic of Korea

<sup>2</sup>Department of Molecular Medicine, College of Medicine, Gachon University, Incheon, Republic of Korea

<sup>3</sup>Department of Plastic and Reconstructive Surgery, Gachon University Gil Medical Center, College of Medicine, Gachon University, Incheon, Republic of Korea

<sup>4</sup>Department of Thoracic and Cardiovascular Surgery, Gachon University Gil Medical Center, College of Medicine, Gachon University, Incheon, Republic of Korea

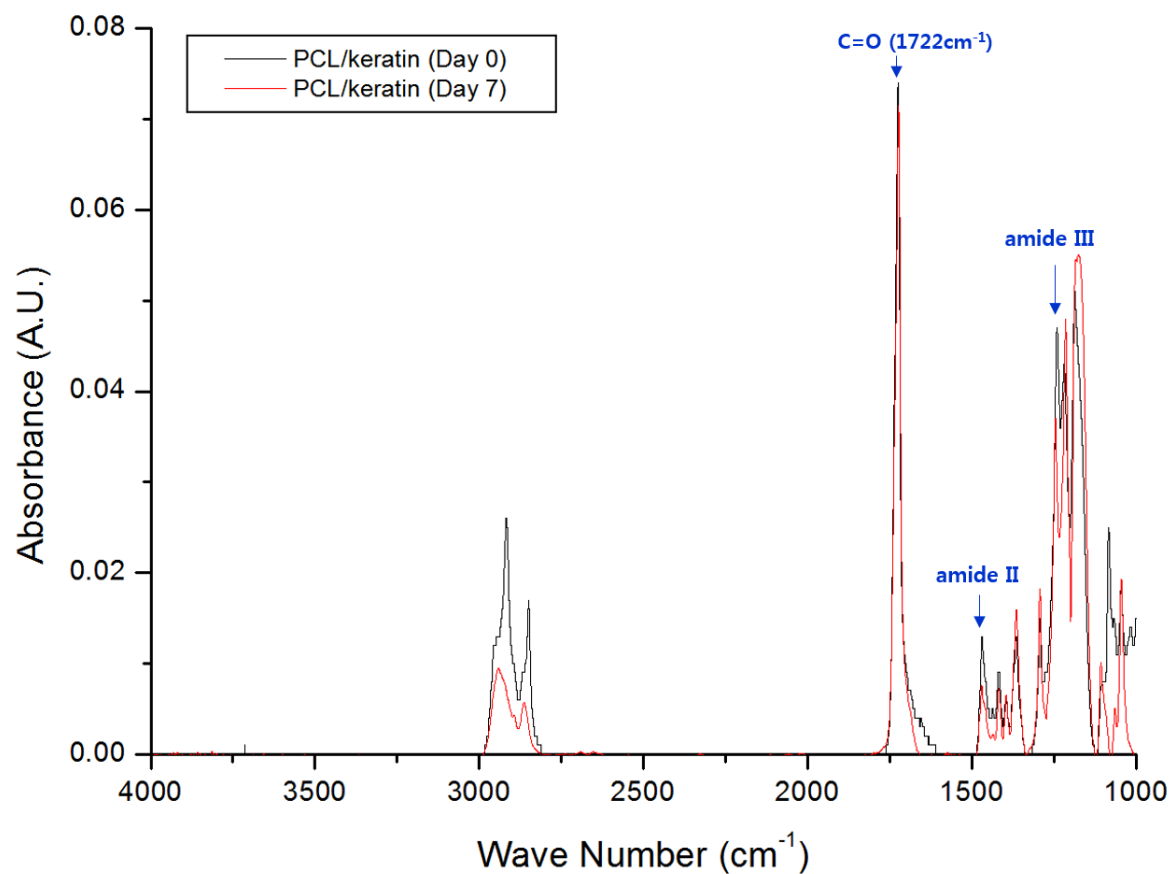

**Figure S1** Analysis of the degradation of PCL/keratin membrane (Comparison between day 0 and day 7)
